# Supplementary material
Source: publisher figshare collection journal article supplement (https://acs.figshare.com/ndownloader/files/26476697)
Supplement: Supplementary file 1 [file 26476697]

# **Electronic Control of Hot Electron Transport Using Modified Schottky Barriers in Metal–Semiconductor Nanodiodes**

Beomjoon Jeon<sup>1,2</sup>, Changhwan Lee<sup>1,2</sup>, and Jeong Young Park<sup>1,2\*</sup>

<sup>1</sup> *Department of Chemistry, Korea Advanced Institute of Science and Technology (KAIST),  
Daejeon, 34141, Republic of Korea.*

<sup>2</sup> *Center for Nanomaterials and Chemical Reactions, Institute for Basic Science (IBS),  
Daejeon, 34141, Republic of Korea.*

\*To whom correspondence should be addressed. E-mail: jeongypark@kaist.ac.kr

**KEYWORDS:** *Hot electron, effective charge transfer, chemicurrent, photocurrent, Schottky barrier modification, metal–semiconductor composites*

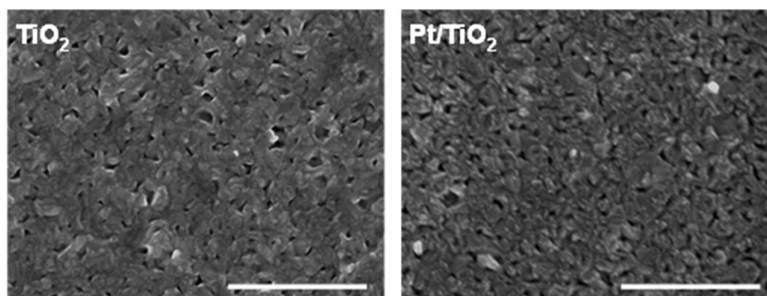

**Figure S1.** Scanning electron microscopy (SEM) images of TiO<sub>2</sub> and Pt/TiO<sub>2</sub>, respectively. All scale bars indicate 500 nm.

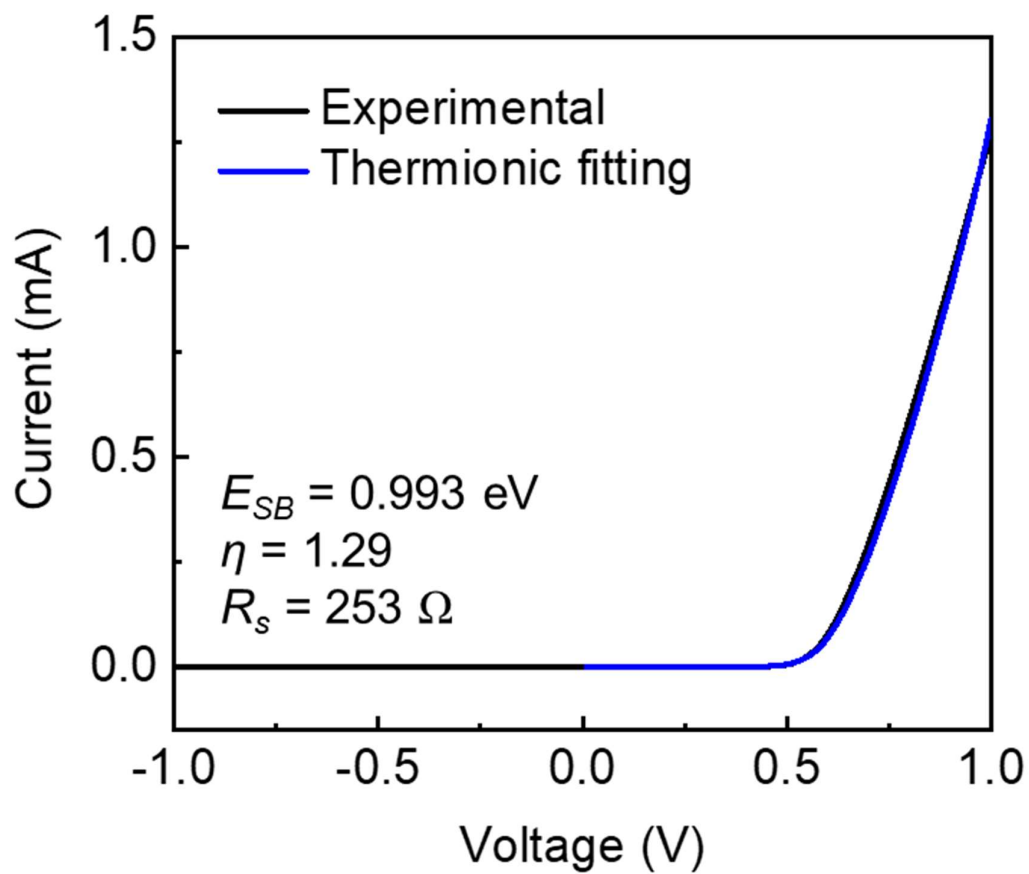

**Figure S2.** I-V characteristics of Pt/TiO<sub>2</sub> Schottky nanodiode. Schottky barrier ( $E_{SB}$ ), ideality factor ( $\eta$ ), and series resistance ( $R_s$ ) are shown.

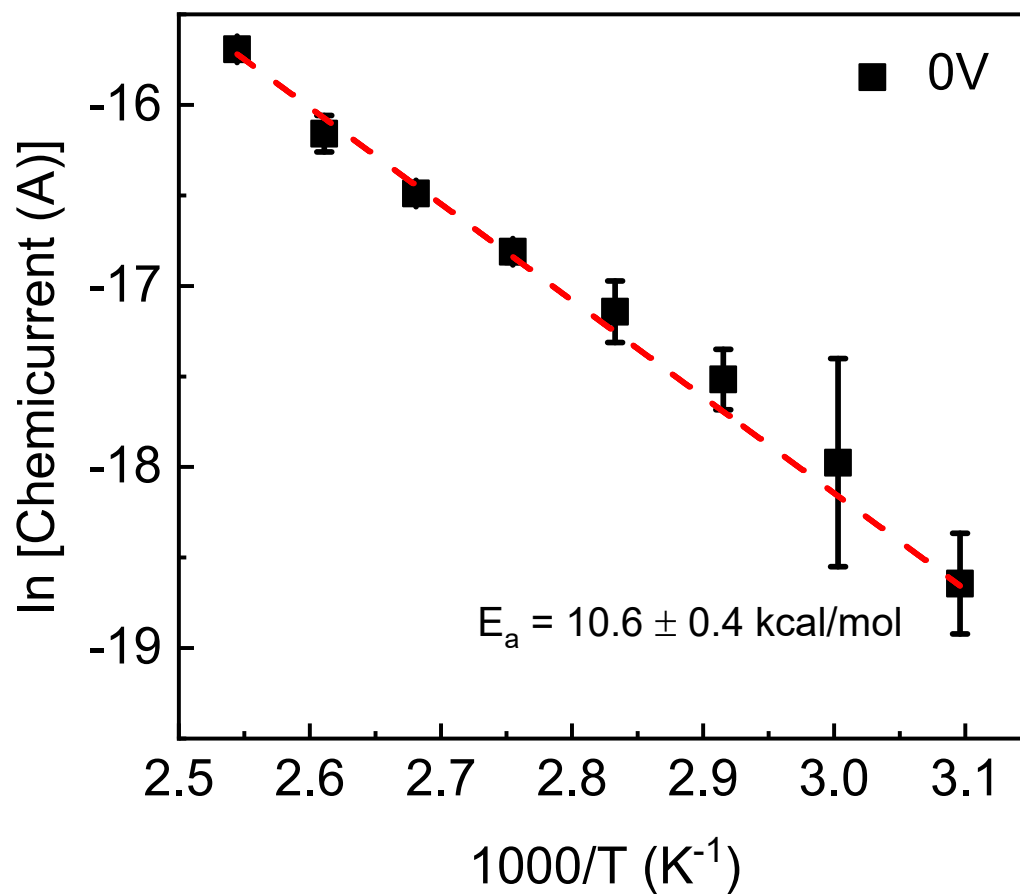

**Figure S3.** An Arrhenius plot of the chemicurrent without external bias. An activation energy of chemicurrent is shown.

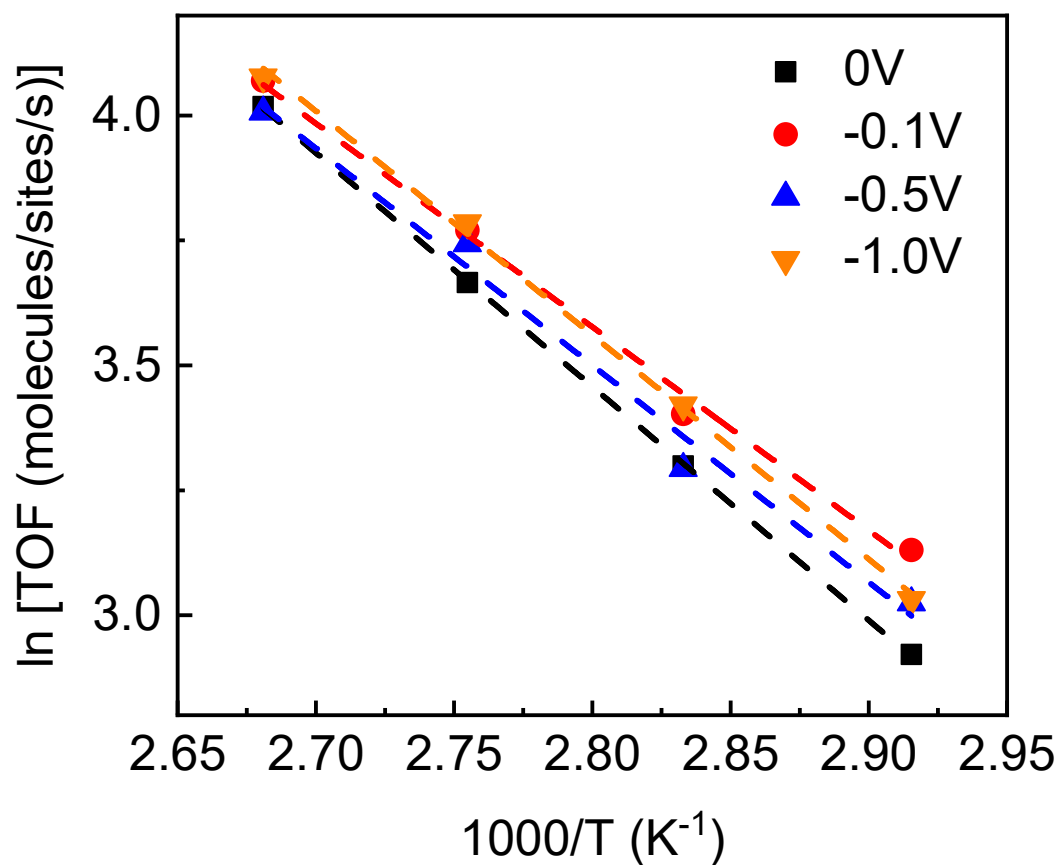

**Figure S4.** Arrhenius plot of turnover frequency (TOF) of Pt/TiO<sub>2</sub> Schottky nanodiode with applying reverse bias from 0 to -1.0 V. All results were gained at temperature from 70 to 100 °C.

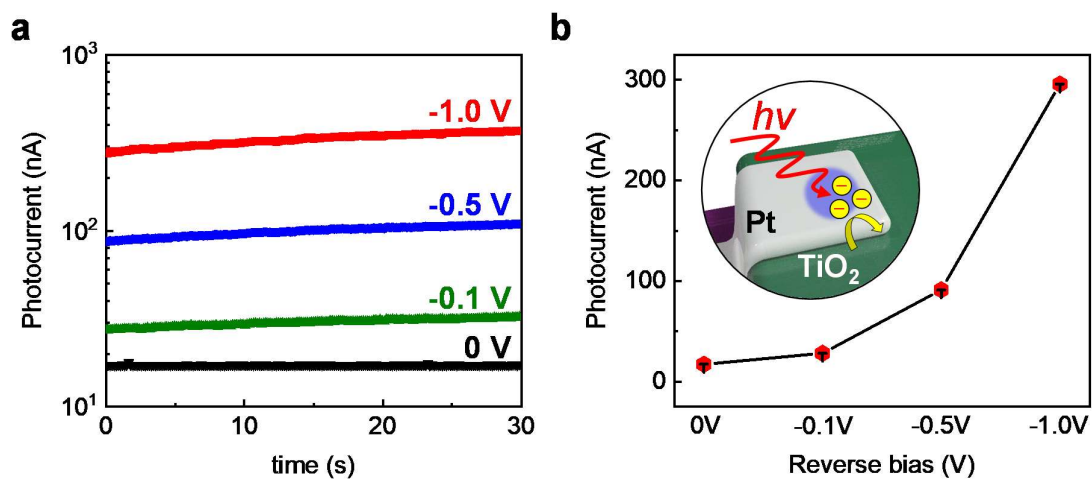

**Figure S5.** (a) Photocurrent of Pt/TiO<sub>2</sub> Schottky nanodiode with reverse bias as time goes by. (b) Photocurrent magnitude with respect to the applied reverse bias ranging from 0 to -1.0 V.

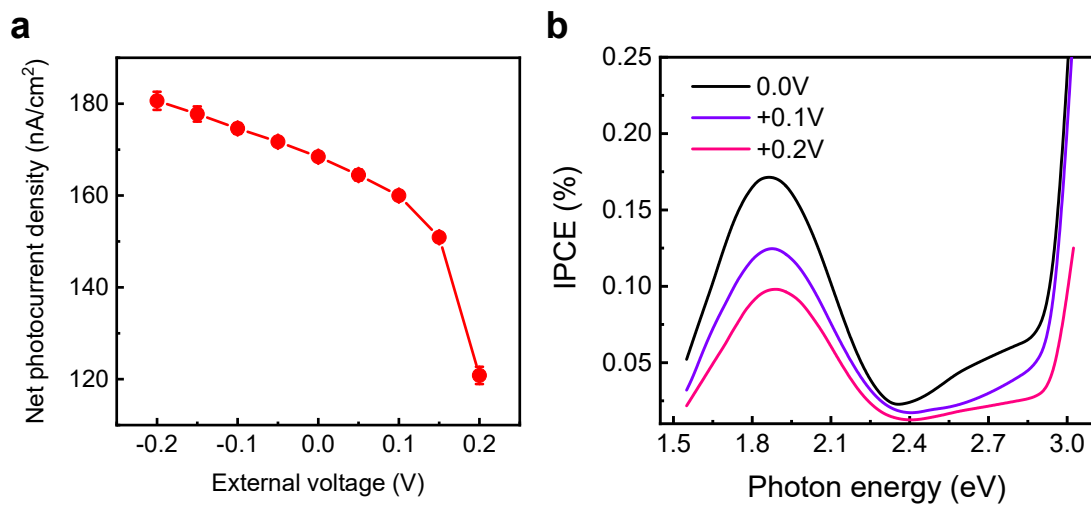

**Figure S6.** (a) Photocurrent of plasmonic Au/TiO<sub>2</sub> Schottky nanodiode near zero bias region (from -0.2 V to +0.2 V). (b) Incident photon-to-electron conversion efficiency (IPCE) of plasmonic Au/TiO<sub>2</sub> Schottky nanodiode with the applied positive bias ranging from 0 to +0.2 V.
